# Supplementary material for: Can Pediatric Intermediate Care Optimize PICU Utilization? Outcomes from a Single-Center Study
Source: Research Square preprint supplement (doi:10.21203/rs.3.rs-7861766/v1), 2025-11-04
Supplement: Supplementary file 1 [file bbe71c5b99da4e94ad751192.docx]

**Supplementary material 1**

Criteria for the admission of children to the Pediatric Intermediate Care Unit: the patient may have one of the listed diagnoses and/or require one of the listed interventions, or both.

| **Organ System** | **Conditions** | **Interventions** |
| --- | --- | --- |
| Respiratory | Acute or acute-on-chronic respiratory failure (e.g., asthma, bronchiolitis, croup, tracheitis, pneumonia), apnea workup, impaired airway clearance requiring frequent suctioning, tracheostomized patients with stable home ventilation, pleural drainage. | Continuous cardiorespiratory monitoring, high-flow oxygen therapy (FiO₂ > 40%), noninvasive positive pressure ventilation, , frequent airway suctioning (q2–4h), light-to-moderate sedation, tracheostomy and ventilator management, chest tube management. |
| Cardiovascular | Non-life-threatening arrhythmias without need for cardioversion; cardiovascular involvement in systemic illness (e.g., SIRS/sepsis/shock). | Continuous cardiorespiratory monitoring, fluid balance monitoring, frequent laboratory testing (≤ q4h), intravenous antiarrhythmics, intravenous fluids. |
| Neurologic | Non-refractory status epilepticus, seizures requiring IV antiepileptic treatment, CNS infections (e.g., meningitis), severe head trauma, neuromuscular disease requiring respiratory support. | Continuous cardiorespiratory and neurologic monitoring (≤ q4h), EEG monitoring, continuous CNS-active/sedative drug infusions (light to moderate sedation). |
| Endocrine/Metabolic | Diabetic ketoacidosis requiring IV insulin, moderate-to-severe electrolyte disturbances needing IV correction, metabolic acidosis needing bicarbonate, acute decompensation in congenital metabolic diseases. | Continuous cardiorespiratory and neurologic monitoring, continuous IV insulin, disease-specific metabolic therapy, frequent blood sampling (≤ q4h), continuous/frequent cardiorespiratory and neurologic monitoring, fluid balance monitoring. |
| Gastrointestinal | Acute GI bleeding requiring transfusions or IV therapy, acute or chronic liver/pancreatic insufficiency, foreign body requiring endoscopic removal. | Continuous cardiorespiratory monitoring (≤ q4h), fluid balance monitoring, frequent lab testing (≤ q4h). |
| Hematologic/Oncologic | Severe anemia needing transfusions, sickle cell crises (VOC/ACS), neutropenic/pancytopenic oncology patients. | Continuous cardiorespiratory monitoring (≤ q4h), fluid balance monitoring, frequent transfusions or blood product infusions, CNS/sedative/analgesic infusions (light to moderate sedation), cytapheresis |
| Renal | Acute or acute-on-chronic hypertension needing IV therapy without neurologic impairment, nephrotic syndrome with mild hemodynamic compromise, renal failure with metabolic derangement. | Continuous cardiorespiratory monitoring, IV antihypertensives (bolus or continuous), fluid balance monitoring, frequent blood testing (≤ q4h), intermittent dialysis. |
| Multisystem/Other | Acute intoxication with moderate neurologic or respiratory compromise, palliative patients requiring continuous infusions for end-of-life care or anxiety. | Continuous cardiorespiratory and neurologic monitoring, continuous CNS/sedative infusions (light to moderate sedation), tracheostomy and ventilator management. |

**Supplementary material 2**

NIV Group (underlined text indicates reason for exclusion from the Low-Risk Group).

|  | **Interfaces** | **Sedation** | **As needed adjunctive sedation** | **NIV days** | **Respiratory support at discharge** |
| --- | --- | --- | --- | --- | --- |
| **Patients who met the criteria for the Low-Risk NIV Group** | | | | | |
| Patient 6 | Nasal mask | - | - | 2 | None |
| Patient 9 | Nasal cannula RAM ® | - | - | 3 | None |
| Patient 11 | Nasal cannula RAM ® | - | - | 1 | None |
| Patient 7 | Nasal cannula RAM ® | Dexmedetomidine | - | 2 | None |
| Patient 8 | Nasal cannula RAM ® | Dexmedetomidine | - | 2 | None |
| Patient 10 | Nasal cannula RAM ® | Dexmedetomidine | - | 4 | None |
| Patient 13 | Nasal cannula RAM ® | Dexmedetomidine | - | 4 | None |
| Patient 14 | Nasal cannula RAM ® | Dexmedetomidine | - | 3 | None |
| Patient 15 | Nasal cannula RAM ® | Dexmedetomidine | - | 4 | None |
| **Patients who did not met the criteria for the Low-Risk NIV Group** | | | | | |
| Patient 1 | Nasal cannula RAM ® | Dexmedetomidine | Morphine | 5 | None |
| Patient 2 | Nasal cannula RAM ® | Dexmedetomidine | Ketamine | 9 | None |
| Patient 3 | Nasal cannula RAM ® | Dexmedetomidine | Morphine | 6 | None |
| Patient 4 | Nasal cannula RAM ® | Dexmedetomidine | Morphine | 1 | None |
| Patient 12 | Oro-nasal mask | Dexmedetomidine | Ketamine | 3 | None |
| Patient 16 | Nasal cannula RAM ® | Dexmedetomidine | Ketamine | 2 | None |
| Patient 17 | Nasal cannula RAM ® | Dexmedetomidine | Ketamine | 3 | None |
| Patient 5 | Full-face mask | Dexmedetomidine | Ketamine | 2 | None |
